# Supplementary material
Source: Springer Nature journal article supplement (https://www.springermedizin.de/resource/supplementary/12885_2012_3669_MOESM6_ESM.pdf/9465878)

**A****Real time-PCR****MCF-7**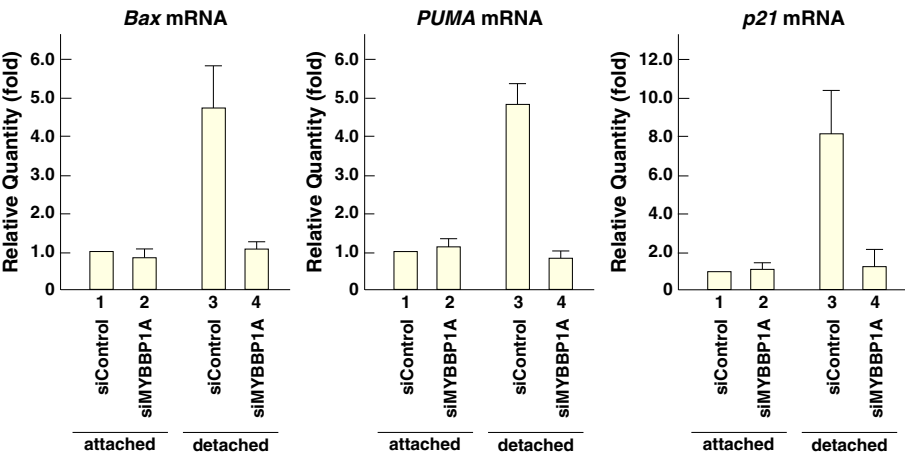**B****Realtime-PCR****ZR-75-1**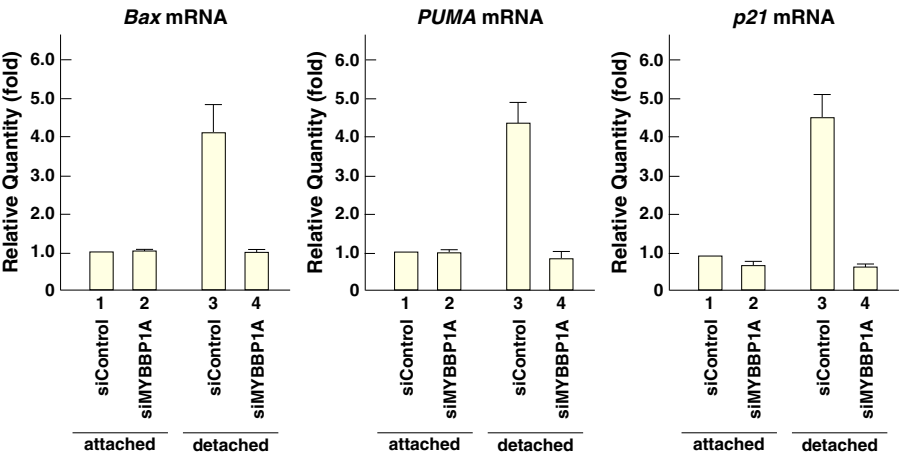

Supplement: MOESM6 [file 9465878]
